# Supplementary material for: A network perspective on patient experiences and health status: the Medical Expenditure Panel Survey 2004 to 2011
Source: PubMed Central journal article supplement (PMC5567925; doi:10.1186/s12913-017-2496-5), 2017-08-22
Supplement: 12913_2017_2496_MOESM4_ESM.pdf [file 12913_2017_2496_MOESM4_ESM.pdf]

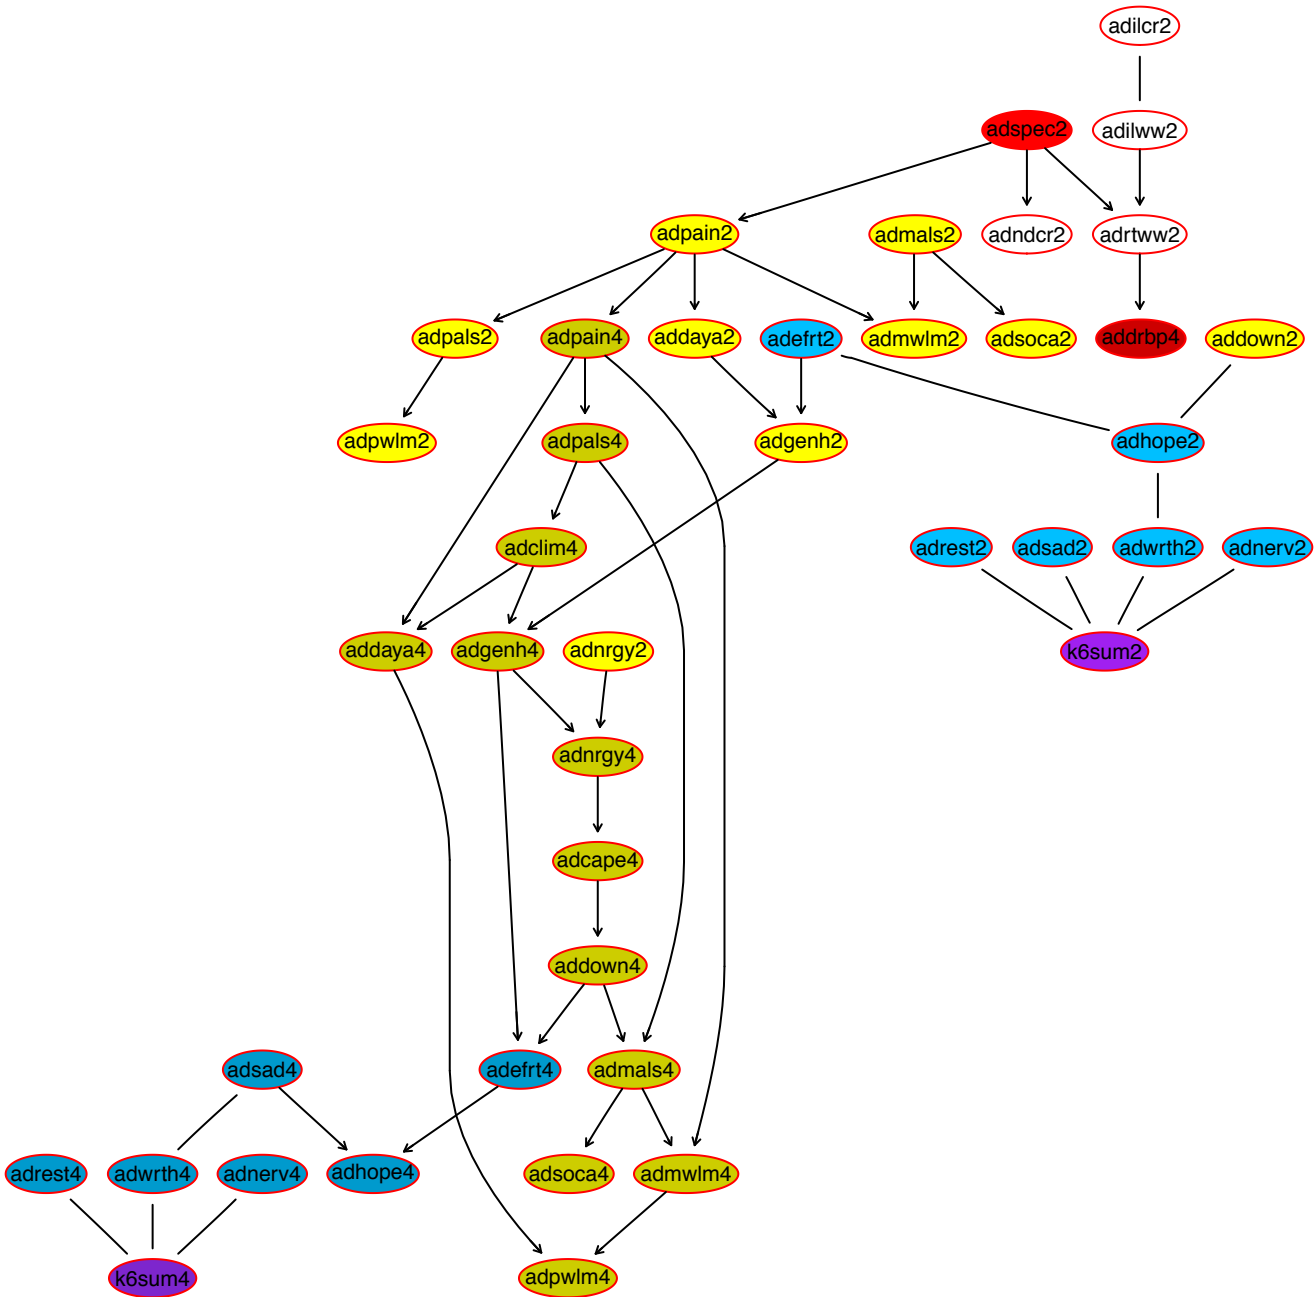

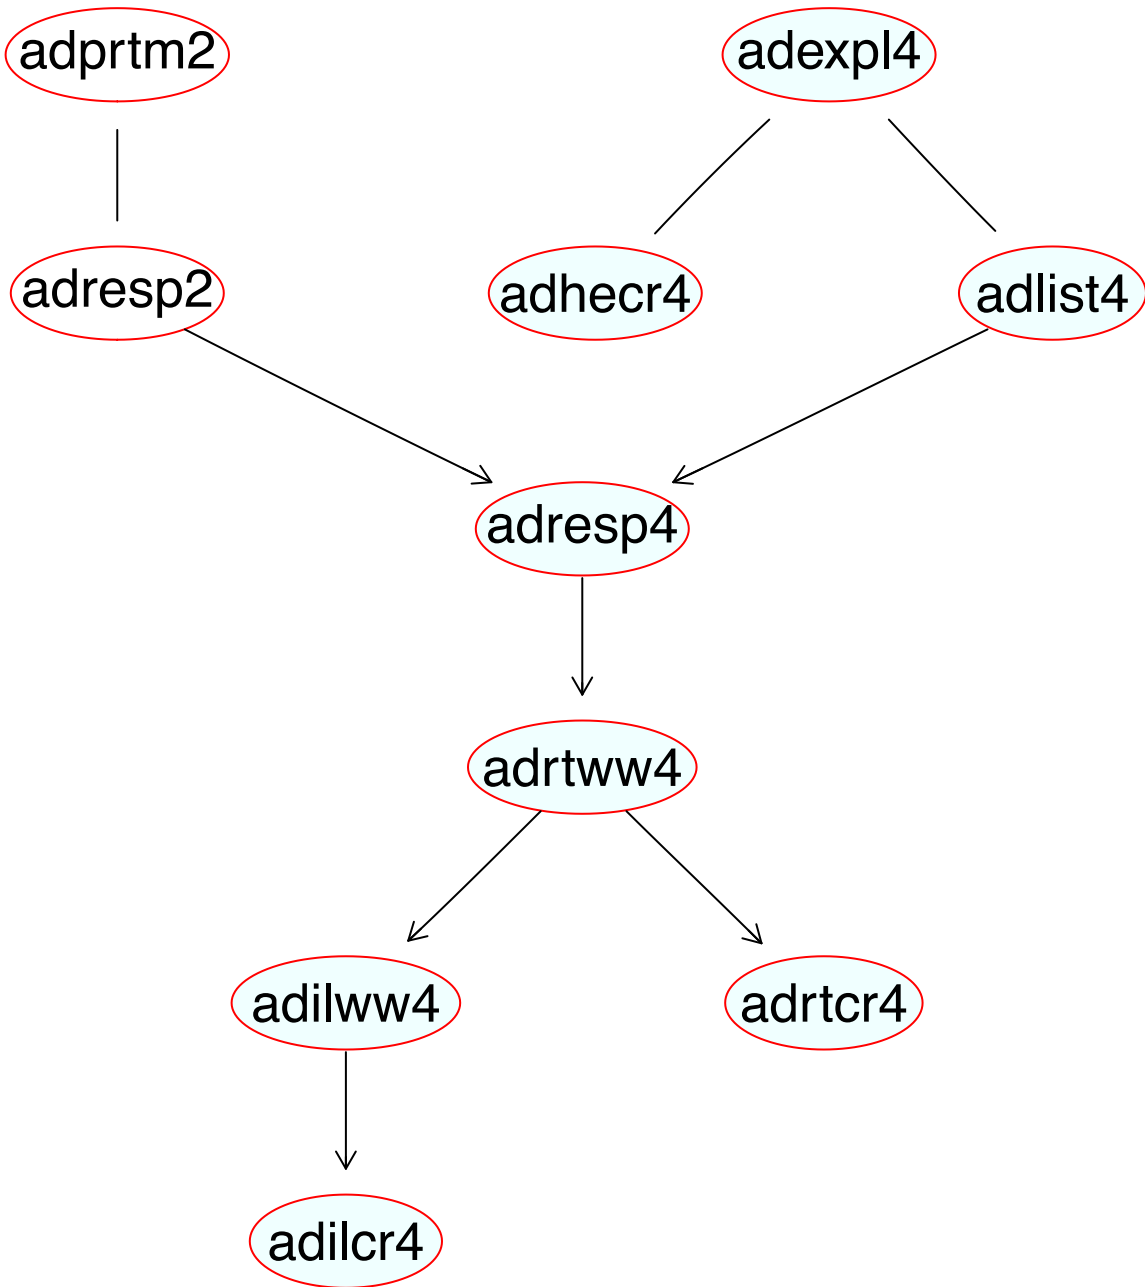

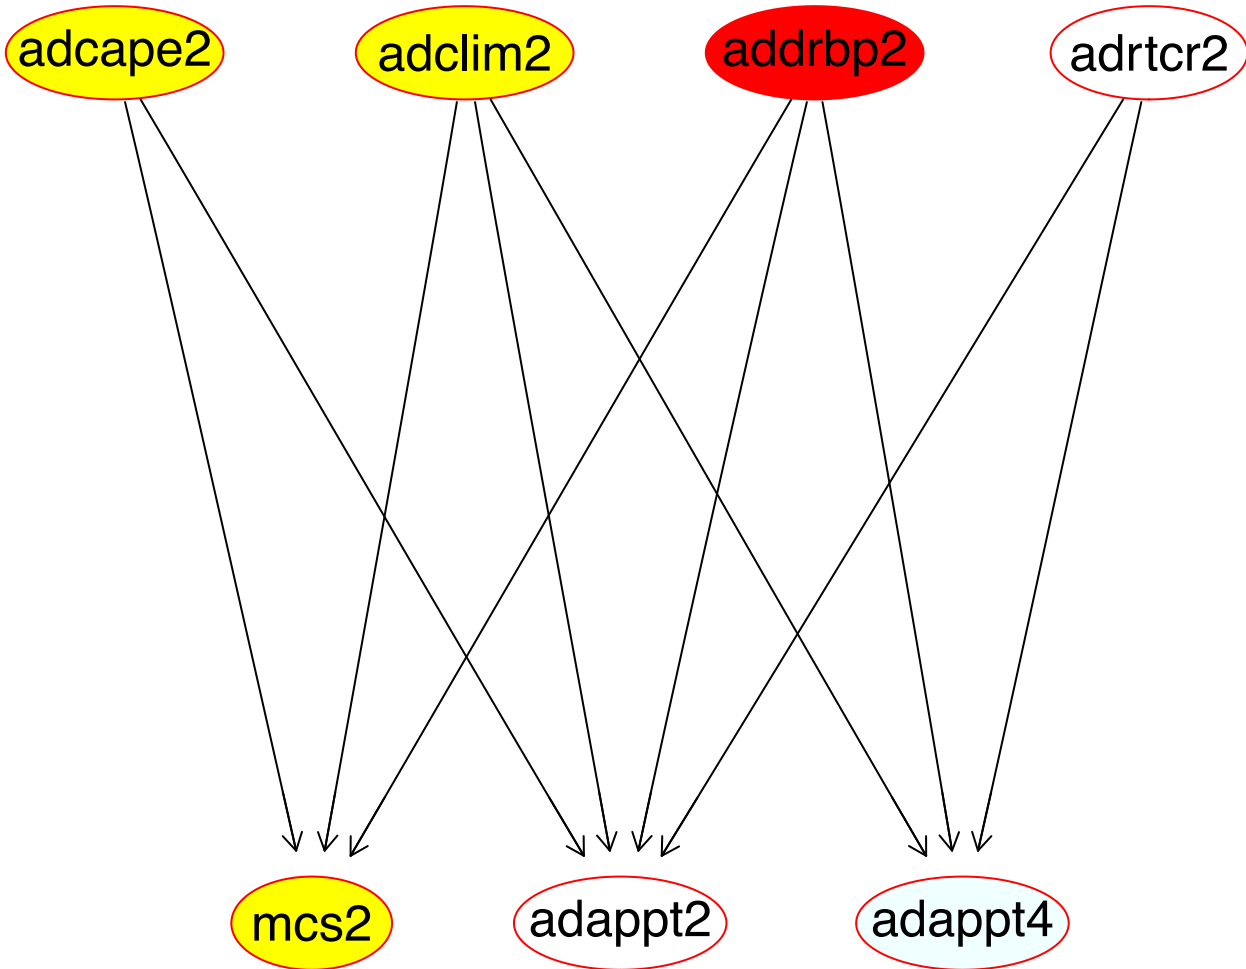

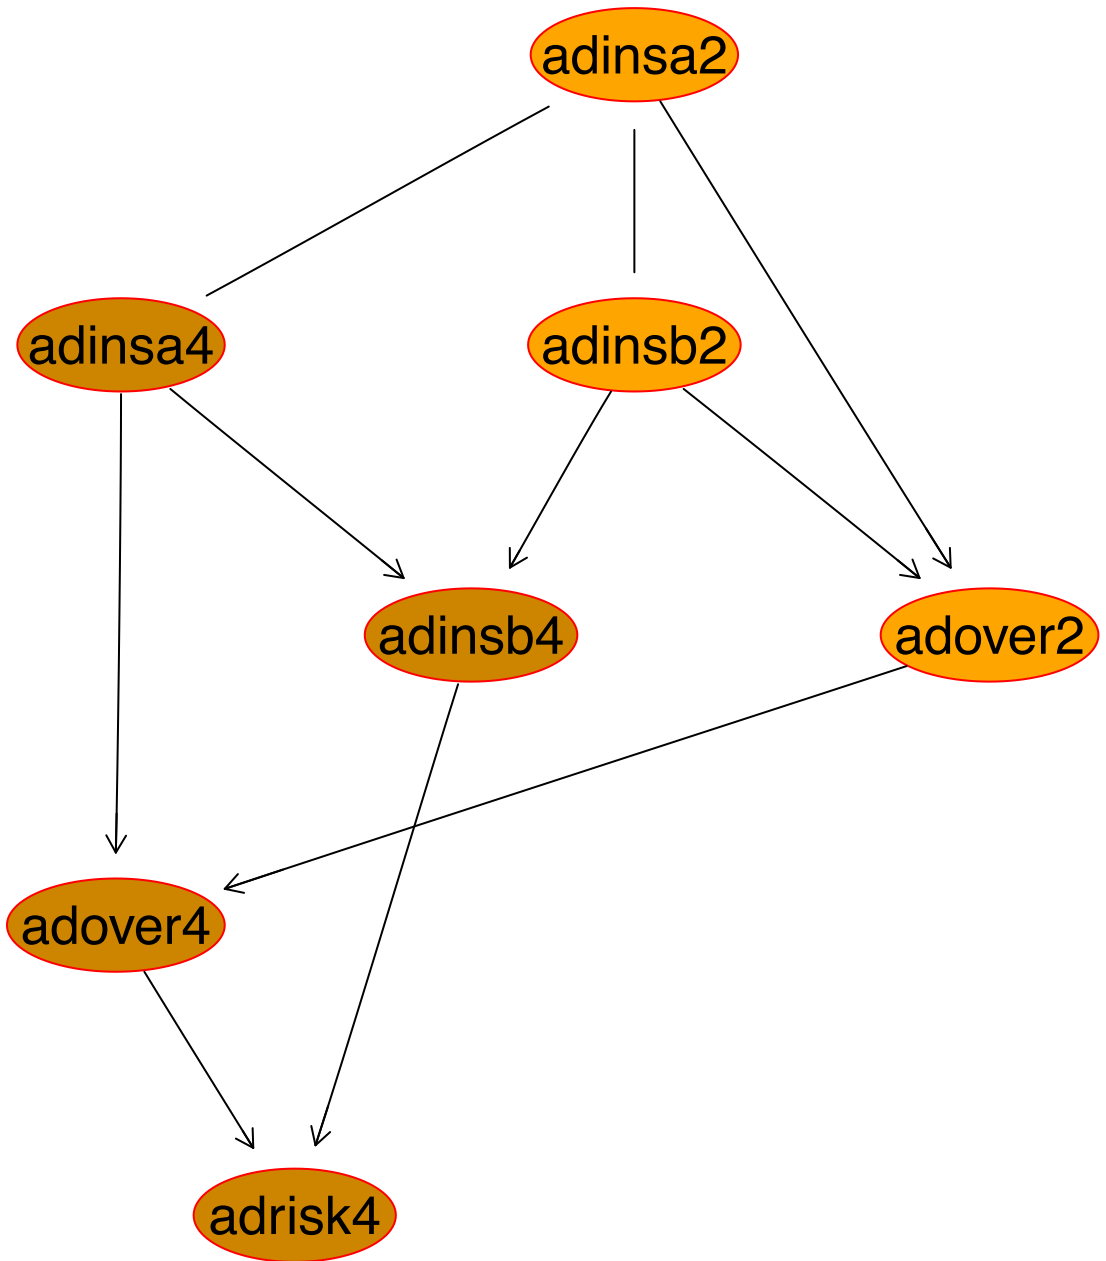

addprs2

adintr2

phq22

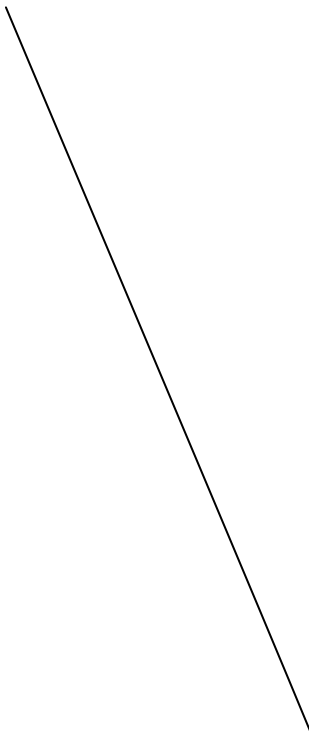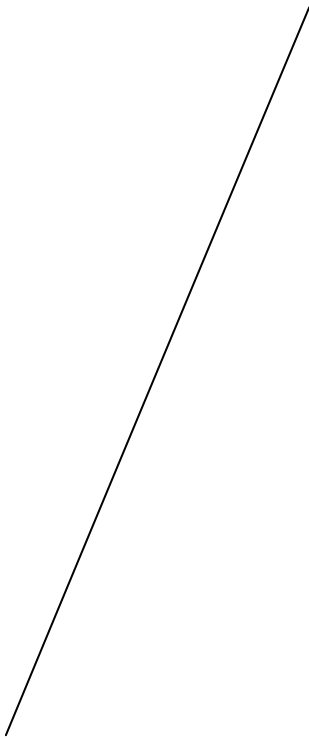

adexpl2

adhecr2

adlist2

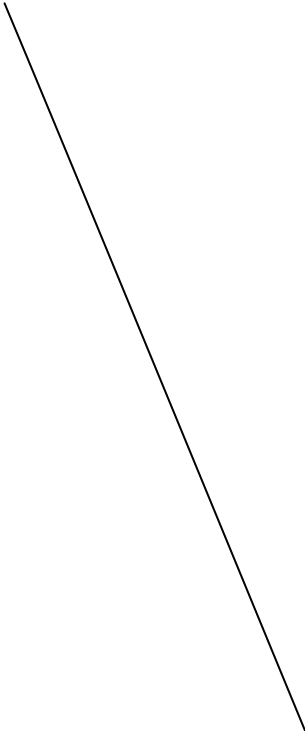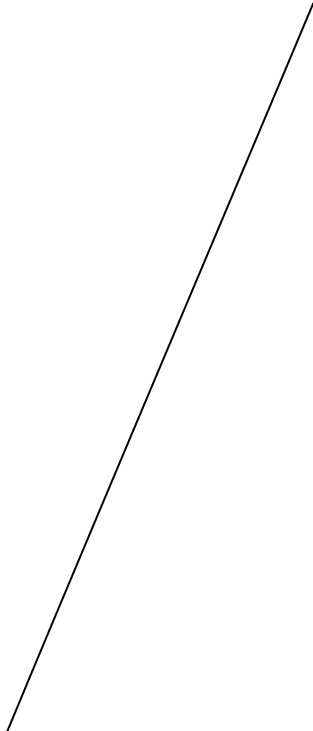

addprs4

adintr4

phq24

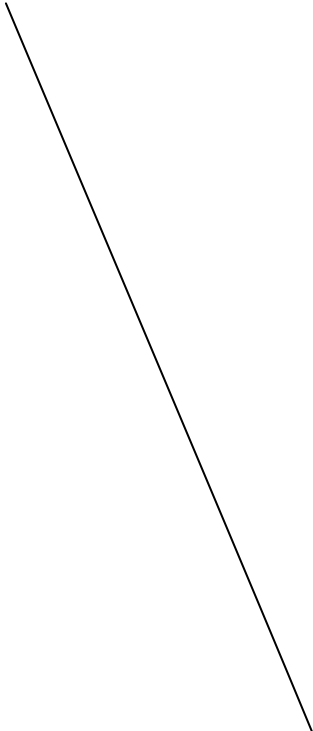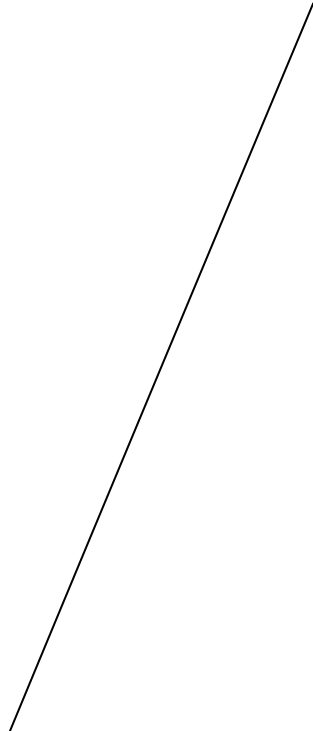

adnsmk2

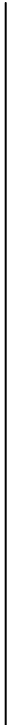

adsmok2



adnsmk4



adsmok4
