# Supplementary material for: A network perspective on patient experiences and health status: the Medical Expenditure Panel Survey 2004 to 2011
Source: PubMed Central journal article supplement (PMC5567925; doi:10.1186/s12913-017-2496-5), 2017-08-22
Supplement: 12913_2017_2496_MOESM5_ESM.pdf [file 12913_2017_2496_MOESM5_ESM.pdf]

last 12 months: dr spent enuf time with you  
, year 1

last 12 months: doctor explained in a way that is understandable  
, year 2

last 12 months: doctor showed respect  
, year 1

last 12 months: rating of health care  
, year 2

last 12 months: doctor listened to you  
, year 2

last 12 months: doctor showed respect  
, year 2

last 12 months: got medical appointment when wanted  
, year 2

last 12 months: got care when needed in case of illness/inj  
, year 2

last 12 months: made appointment for routine medical care  
, year 2

last 12 months: needing immed care for illness/injury  
, year 2

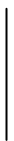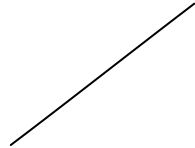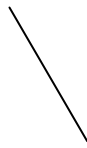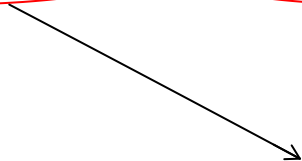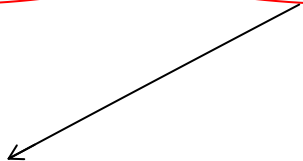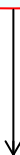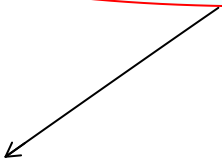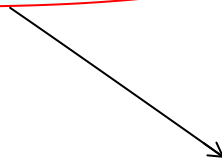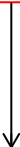

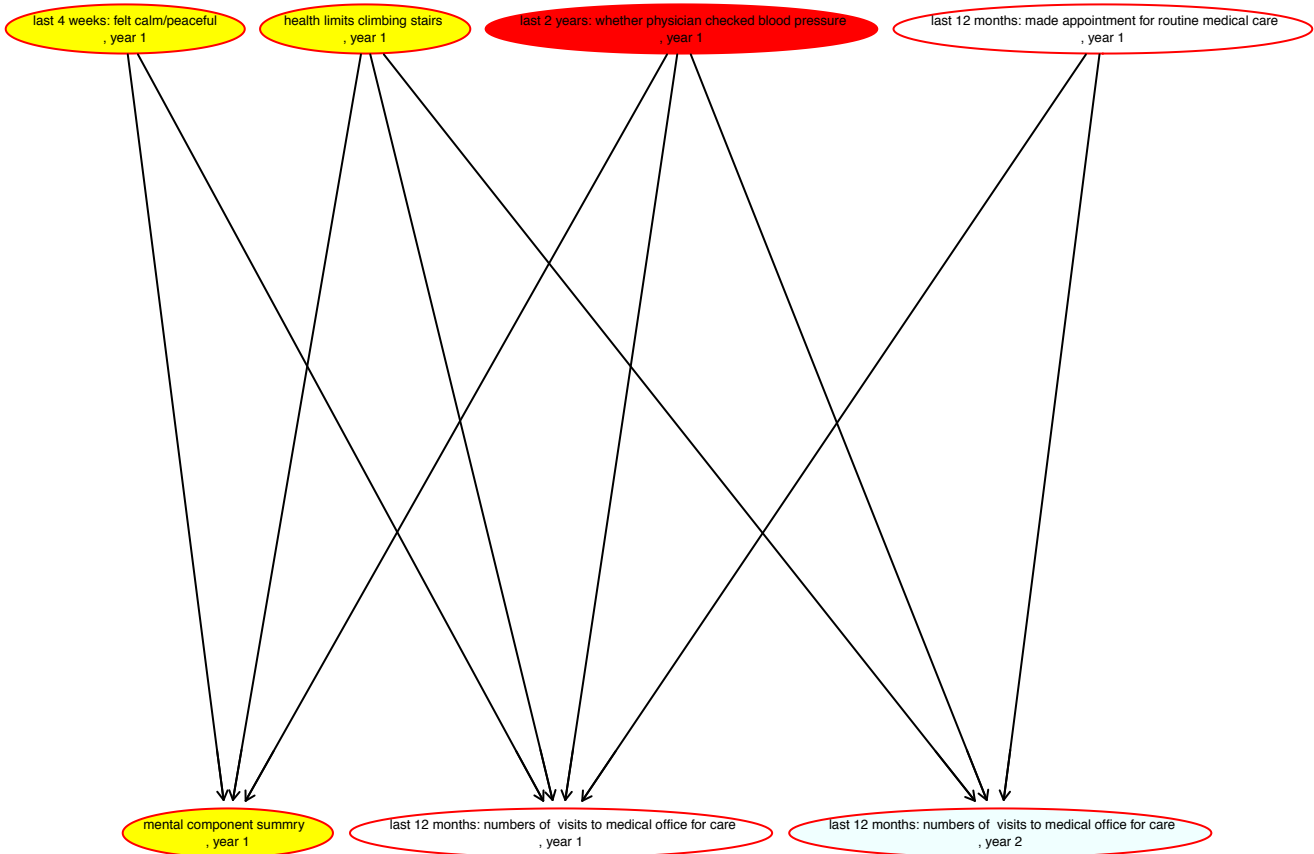

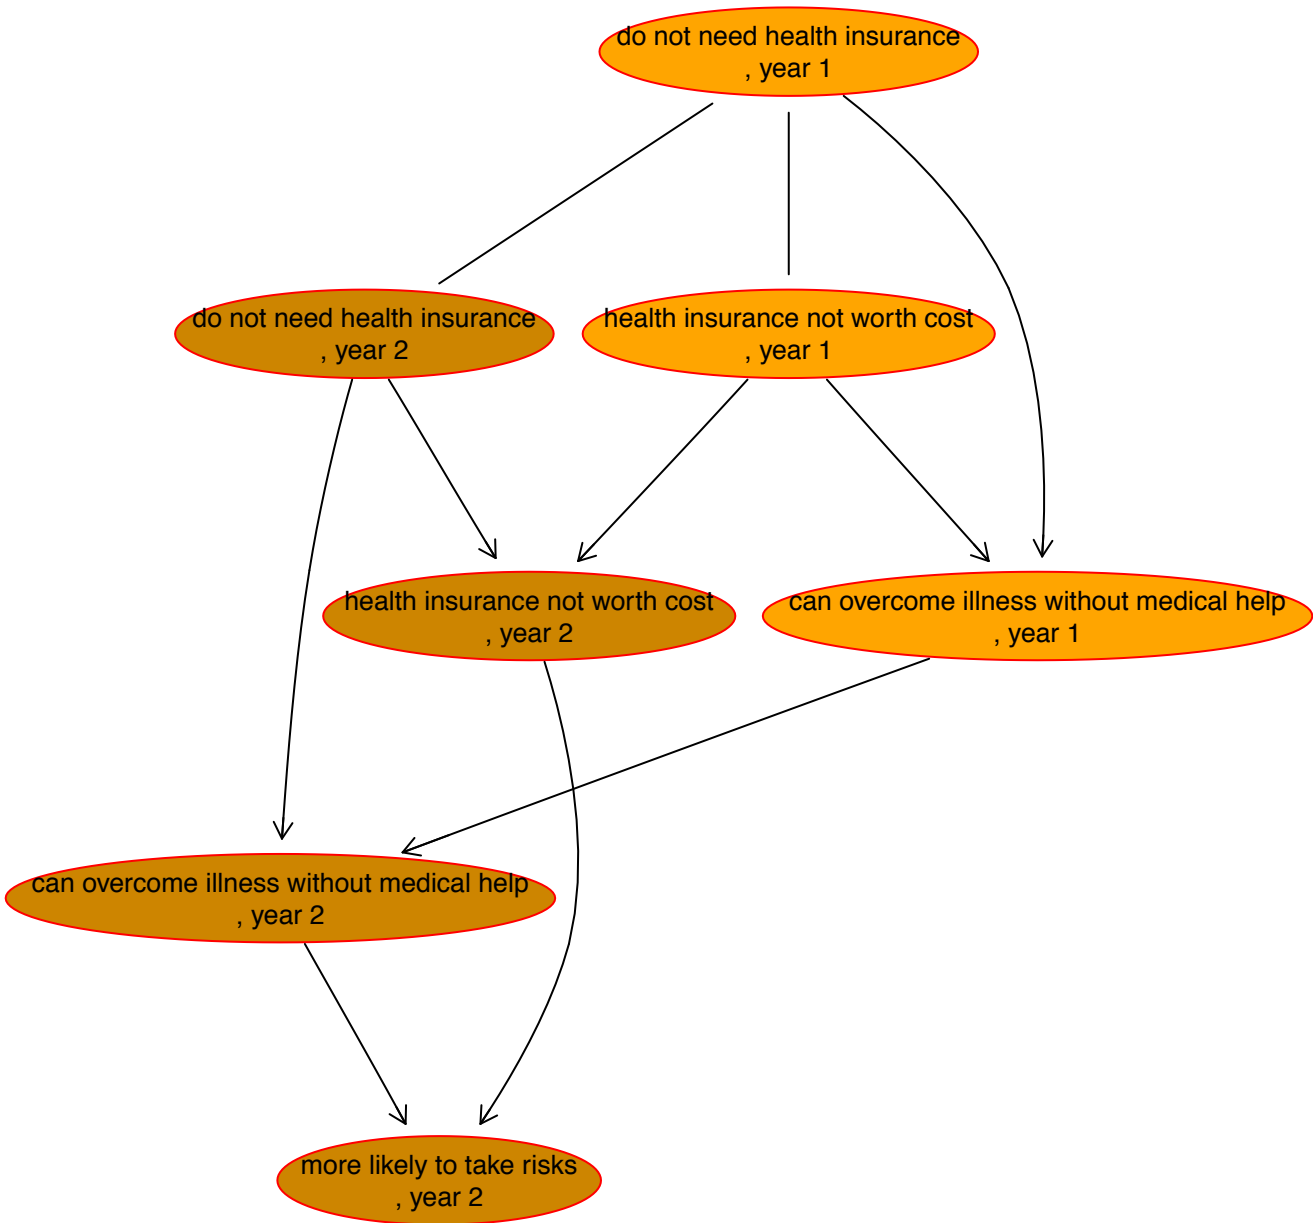

last 2 weeks: felt down/depressed/hopeless  
, year 1

last 2 weeks: little interest in things  
, year 1

last 2 weeks: overall rating of feelings  
, year 1

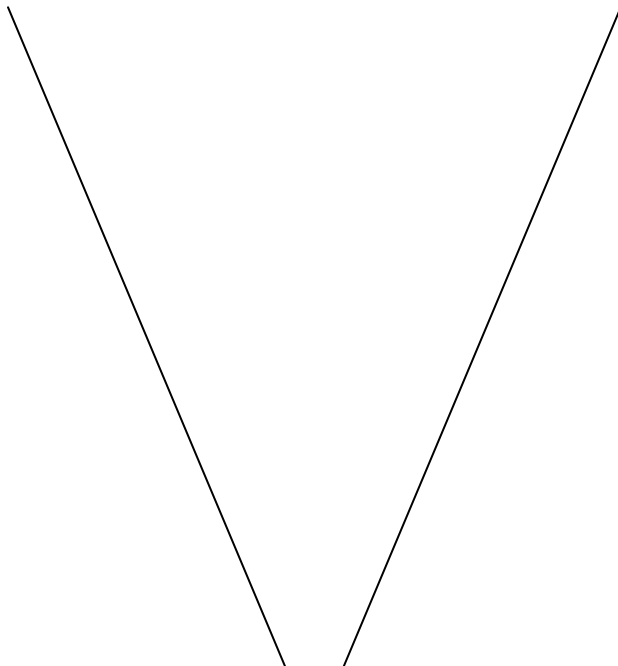

last 12 months: doctor explained in a way that was understandable  
, year 1

last 12 months: rating of health care  
, year 1

last 12 months: doctor listened to you  
, year 1

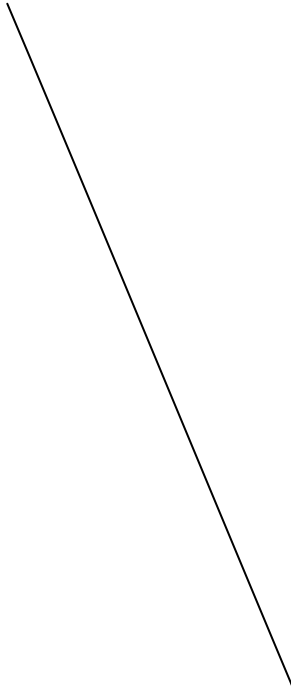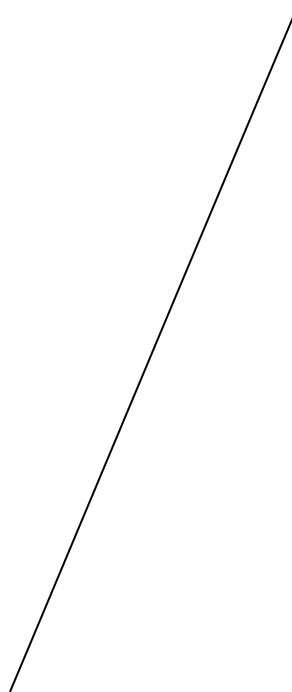

last 2 weeks: felt down/depressed/hopeless  
, year 2

last 2 weeks: little interest in things  
, year 2

last 2 weeks: overall rating of feelings  
, year 2

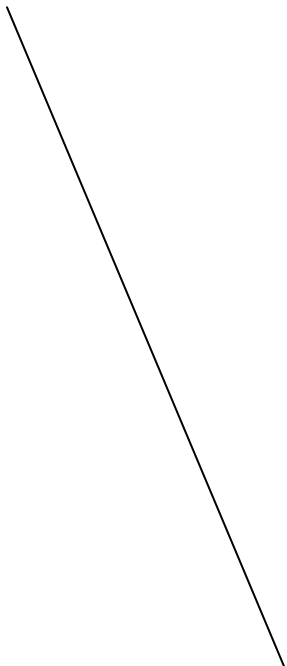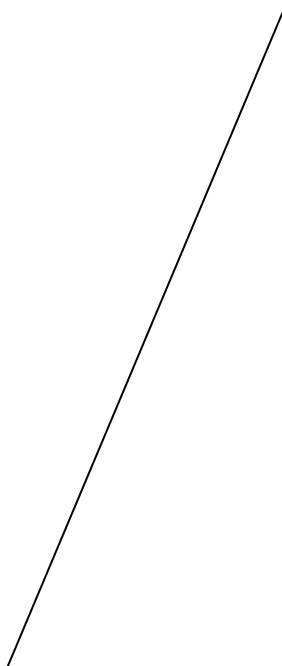

last 12 months: doctor advised to quit smoking  
, year 1

currently smoke  
, year 1



last 12 months: doctor advised to quit smoking  
, year 2

currently smoke  
, year 2
