# Supplementary material for: A network perspective on patient experiences and health status: the Medical Expenditure Panel Survey 2004 to 2011
Source: BMC Health Serv Res. 2017 Aug 22;17:579. doi: 10.1186/s12913-017-2496-5 (PMC5567925; doi:10.1186/s12913-017-2496-5)
Supplement: Supplementary file 1 — Appendix 1. Characteristics of the included variables from the Medical Expenditure Panel Survey. The characteristics of the variables included for analysis. (XLSX 14 kb) [file 12913_2017_2496_MOESM1_ESM.xlsx]

## Sheet: Sheet 1
Variables
